# Supplementary material for: Enriching thermodynamically best aptamers by addressing the kinetic aspect of the DNA strand-displacement reaction
Source: Research Square preprint supplement (doi:10.21203/rs.3.rs-6946385/v1), 2025-06-30
Supplement: Supplementary file 1 [file 622c488204fcf0fbe48385e5.pdf]

## **Supplementary Information**

### **Enriching thermodynamically best aptamers by addressing the kinetic aspect of the DNA strand-displacement reaction**

Yuzhe Ding, Yicheng Heng, Ka-Ying Wong, Juewen Liu\*

Department of Chemistry, Waterloo Institute for Nanotechnology, University of Waterloo,  
Waterloo, Ontario, N2L 3G1, Canada

Email: liujw@uwaterloo.ca

## **Materials and Methods**

### **Chemicals**

The DNA samples used in this study were purchased from Integrated DNA Technologies (Coralville, IA, USA) (see Table S1 for sequences). Streptavidin agarose resin was obtained from Thermo Scientific (IL, USA), while metronidazole and 6-aminopenicillanic acid were sourced from Aladdin (Shanghai, China). Sodium chloride and magnesium chloride were purchased from Amerseco (Framingham, MA, USA). Ampicillin and penicillin G were obtained from Sigma-Aldrich (Burlington, MA, USA), and kanamycin A was supplied by Bio Basic Canada Inc (Markham, ON, Canada). Sodium hydroxide, aspirin, hydrochloric acid, voriconazole, and Amicon Ultra-0.5 centrifugal filter units (10 kDa molecular weight cutoff) were purchased from Millipore-Sigma (Oakville, ON, Canada). Micro bio-spin chromatography columns and SsoFast EvaGreen supermix were obtained from Bio-Rad (Hercules, CA, USA). dNTP mix, Taq DNA polymerase with ThermoPol buffer, and the low molecular weight DNA ladder were purchased from New England Biolabs (Ipswich, MA, USA). All buffers and solutions were prepared using Milli-Q water. The SELEX buffer for ampicillin consisted of 50 mM MES (pH 6.1), 500 mM NaCl, and 10 mM MgCl<sub>2</sub>, while the SELEX buffer for adenosine contained 20 mM HEPES (pH 7.4), 150 mM NaCl, and 2 mM MgCl<sub>2</sub>.

### **SELEX**

The library design (Table S1) and selection method (Figure S1) were based on previous reports of the Stojanovic group<sup>1</sup> with some modifications. For each round, the single-stranded library was annealed by heating it with a threefold excess of biotinylated capture strand at 95°C for 3 min, followed by gradual cooling to room temperature in SELEX buffer. Meanwhile, 200 µL of agarose resin without streptavidin modification was introduced into a micro chromatography column and washed five times with 500 µL of SELEX buffer. Next, 20 µL of streptavidin agarose resin was added to the single-stranded library tube and incubated for 10 min. The resin, after incubation, was then transferred to the column containing the non-streptavidin-modified agarose resin. The column was subsequently washed 12 times to remove unbound library. After washing, 750 µL of target solution (dissolved in SELEX buffer) was added. For SELEX1, SELEX2, and ADESELEX1, the eluted DNA was directly collected using gravity flow. In contrast, for SELEX3, SELEX4, and ADESELEX2, the target was incubated in the micro chromatography column for 10 min before

being collected via gravity flow. The collected DNA was concentrated using a 10 kDa molecular weight cutoff filter and washed with Milli-Q water three to five times. The final volume of purified DNA was adjusted to 60  $\mu$ L with Milli-Q water. A biotinylated reverse primer was used to synthesize 1 mL of PCR products, which were then incubated with 50  $\mu$ L of streptavidin agarose resin for 20 min and washed ten times with a strand separation buffer (50 mM HEPES, pH 7.4, 150 mM NaCl). Subsequently, 600  $\mu$ L of 0.2 M NaOH was added to the column and incubated for 10 min to elute the single-stranded DNA. After neutralization, the DNA was concentrated to 60  $\mu$ L using a 10 kDa filter, and its concentration was measured with a Spark microplate reader (Tecan) before being used in the next round of selection. The target concentrations and incubation times for the various selections are summarized in Table S2.

### **Isothermal Titration Calorimetry (ITC)**

The ITC experiments were conducted using MicroCal iTC200. Both aptamers and targets were dissolved in their own SELEX buffer and degassed by sonication for 5 min before the start of the experiment. The cell chamber was loaded with 205  $\mu$ L aptamer solution, while the syringe contained 40.5  $\mu$ L of target solution. All titration experiments were conducted at a temperature of 25°C. The obtained titration curves were fitted using a one-site binding model by Origin software.

### **ThT fluorescence spectroscopy**

In the ThT binding assays, the aptamer and ThT were prepared at final concentrations of 500 nM and 10  $\mu$ M, respectively, in their respective SELEX buffers, with a total volume of 500  $\mu$ L. Fluorescence measurements were performed on a Horiba Fluoromax 4 fluorometer, with excitation at 420 nm and emission at 490 nm. The temperature was maintained at 25°C using a water bath, and titrations began once a stable background fluorescence was confirmed.<sup>2</sup> Each experiment was performed in triplicate. The  $K_d$  value was fitted using  $y = y_0 + aK_d/(K_d + x)$ , where  $x$  represents the concentration of the titrated target and  $a$  is the maximal signal change upon saturation.<sup>3</sup>

In the metal-dependent experiments, the  $\text{Na}^+$  concentration was varied among 0 mM, 150 mM, and 500 mM. To assess the effect of  $\text{Mg}^{2+}$ , the system was supplemented with 0 mM, 2 mM, or 10 mM  $\text{Mg}^{2+}$ . In experiments with 0 mM  $\text{MgCl}_2$ , 1 mM EDTA was added to chelate any residual divalent cations present in the water. All solutions were prepared using Milli-Q water.

**Table S1.** The DNA sequence used in this work

| DNA names                | Sequences (from 5' to 3')                                               |
|--------------------------|-------------------------------------------------------------------------|
| N30 library              | GGAGGCTCTCGGGACGAC-N30-<br>GTCGTCCCGATGCTCTGAATCACA                     |
| N36 library              | GGAGGCTCTCGGGACGAC-N36-<br>GTCGTCCCGATCACTTGAATGGTCT                    |
| Reverse primer (RP)      | CTGTGATTCAGAGCATCGGGACG                                                 |
| Biot-Reverse primer      | /5Biosg/ CTGTGATTCAGAGCATCGGGACG                                        |
| Biot-Column              | GTCGTCCCGAGAGCCATA /3BioTEG/                                            |
| Forward primer (FP)      | GGAGGCTCTCGGGACGAC                                                      |
| AMP-H1                   | GACGACGCCGTCTCGTACTCAGCCGTCATCTTACTAGTCGTC                              |
| AMP-L2                   | GACGACGCCATCCCGTACCCAGCCGTCATCTTACTAGTCGTC                              |
| AMP-L3                   | GACGACGCCATCCCGTACTCTGCCGTCATCTTACTAGTCGTC                              |
| A10G                     | GACGACGCCGTCCCGTACCCAGCCGTCATCTTACTAGTCGTC                              |
| C13T                     | GACGACGCCATCTCGTACCCAGCCGTCATCTTACTAGTCGTC                              |
| C19T                     | GACGACGCCATCCCGTACTCAGCCGTCATCTTACTAGTCGT                               |
| G12A                     | ACGACGTTTGCAATGAGAAACGTATGGTTTCGAAGGTCGT                                |
| FAMAMP6H-1               | /56-FAM/<br>GGCTCTCGGGACGACGCCGTCTCGTACTCAGCCGTCATCTTACTAG<br>TCGTCCCGA |
| FAMAMP6L-2               | /56-FAM/<br>GGCTCTCGGGACGACGCCATCCCGTACCCAGCCGTCATCTTACTAG<br>TCGTCCCGA |
| FAM-Ade1301              | /56-FAM/ CTCTCGACGACGTTTGCGATGAGAAACGTATGGTTTC<br>GAAGGTCGTC            |
| FAM-classical<br>aptamer | /56-FAM/ CTCTCGACGACTGGGGGAGTATTGCGGAGGAAGTCGT                          |
| Quencher-strand1         | GTCGTCCCGAGAGCC/3IABkFQ/                                                |
| Quencher-strand2         | AGTCGTCGAGAG /3IABkFQ/                                                  |

Note: /5Biosg/ is biotinylation at the 5'-end, /3BioTEG/ is biotinylation at the 3'-end, FAM is carboxyfluorescein, and /3IABkFQ/ is Iowa Black FQ (IDT) quencher at the 3'-end.



A

## SELEX 3: 5 mM ampicillin with 10 min incubation

|                |                                |       |
|----------------|--------------------------------|-------|
| <b>AMP-L2</b>  | GCCATCCCGTACCCAGCCGTCATCTTACTA | 69.1% |
| <b>AMP-H1</b>  | GCCGTCTCGTACTCAGCCGTCATCTTACTA | 29.9% |
| <b>DAMP-H3</b> | GCCATCYCTTACCCAGCTKTCATCTTACTA | 0.1%  |
| <b>DAMP-H4</b> | GCCATCCCGTACCCAGCCGTCATCTTACTA | 0.04% |
| <b>DAMP-H5</b> | GCCATCCCGTACCCAGCCGTCATCTTACTA | 0.03% |

B

SELEX 4: 100  $\mu$ M ampicillin with 10 min incubation

|                |                                |       |
|----------------|--------------------------------|-------|
| <b>AMP-L2</b>  | GCCATCCCGTACCCAGCCGTCATCTTACTA | 93.2% |
| <b>AMP-L3</b>  | GCCATCCCGTACTCTGCCGTCATCTTACTA | 5.7%  |
| <b>AMP-H1</b>  | GCCGTCTCGTACTCAGCCGTCATCTTACTA | 0.1%  |
| <b>DAMP-L4</b> | CNARGCGYGRWGAAGTACTKCWGNCGASGT | 0.01% |
| <b>DAMP-L5</b> | GCCAGCCAGGACCCAGCAGGGARATTACTA | 0.01% |

**Figure S2.** The ampicillin sequencing result for the two selections done with 10 min incubation (SELEX 3 and 4). Sequencing results for ampicillin selection showed a total yield of 38,591 sequences for the 5 mM ampicillin SELEX and 29,274 sequences for the 100  $\mu$ M ampicillin SELEX.

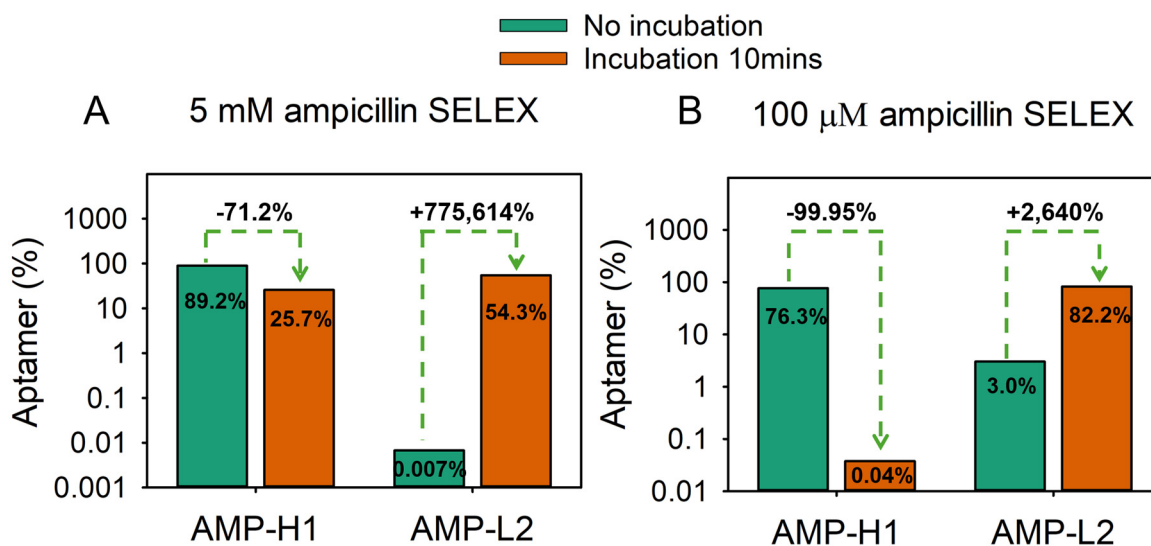

**Figure S3.** Distribution of analyzed sequences obtained from (A) 5 mM ampicillin SELEX and (B) 100  $\mu$ M ampicillin SELEX performed under incubation target and without incubation.

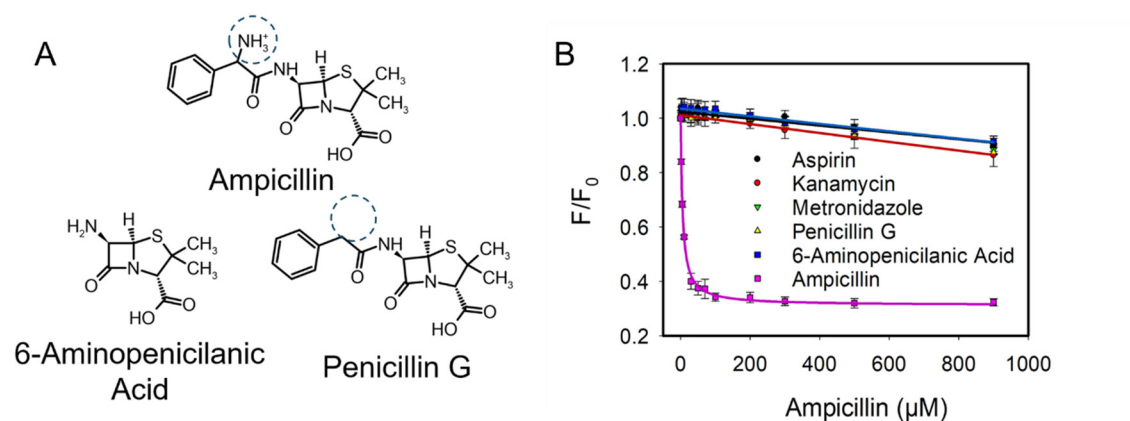

**Figure S4.** (A) Structures of some ampicillin analogs tested for selectivity. (B) The ThT fluorescence titration curve of the AMP-L2 aptamer for ampicillin analogs and other antibiotics and drugs.

| ADESELEX 1: 100 μM adenosine No incubation |                                      |       | ADESELEX 2: 100 μM adenosine with 10 min incubation |                                      |       |
|--------------------------------------------|--------------------------------------|-------|-----------------------------------------------------|--------------------------------------|-------|
| <b>Family 1301</b>                         |                                      |       | <b>Family 1301</b>                                  |                                      |       |
| ADE1                                       | GAAGGAGGACTCCGTAAGGGTACTCGTTTGCATGAG | 24.8% | ADE1                                                | GAAGGAGGACTCCGTAAGGGTACTCGTTTGCATGAG | 19.4% |
| ADE2                                       | GAAGGAGGACTCCGTAAGGGTACTCGTTTGCATGAG | 11.0% | ADE2                                                | GAAGGAGGACTCCGTAAGGGTACTCGTTTGCATGAG | 7.4%  |
| ADE5                                       | GAAGAACTCGGTATGGCGTAGTTTGTTCGATGAG   | 0.4%  | ADE3                                                | GAAGAACTCAGTATGGCATAGTTTGTTCGATGAG   | 1.0%  |
| <b>Other family</b>                        |                                      |       | ADE4                                                | GAAGAACTCAGCATGGCATAGTTTGTTCGATGAG   | 0.6%  |
| ADE3                                       | CGAGTTAGTGAGGCGGGTTCTAGCTTCCA        | 1.8%  | ADE5                                                | GAAGAACTCTGTACGGCATAGTTTGTTCGATGAG   | 0.3%  |
| ADE4                                       | GGCGAGGGGCTTGTCCGATGGCGATGAGTA       | 0.5%  |                                                     |                                      |       |

**Figure S5.** The adenosine sequence result (A) without incubation and (B) after incubation 10 min. Sequencing results for 100 μM adenosine selection showed a total yield of 40,966 sequences without incubation and 39,999 sequences with 10 min incubation.

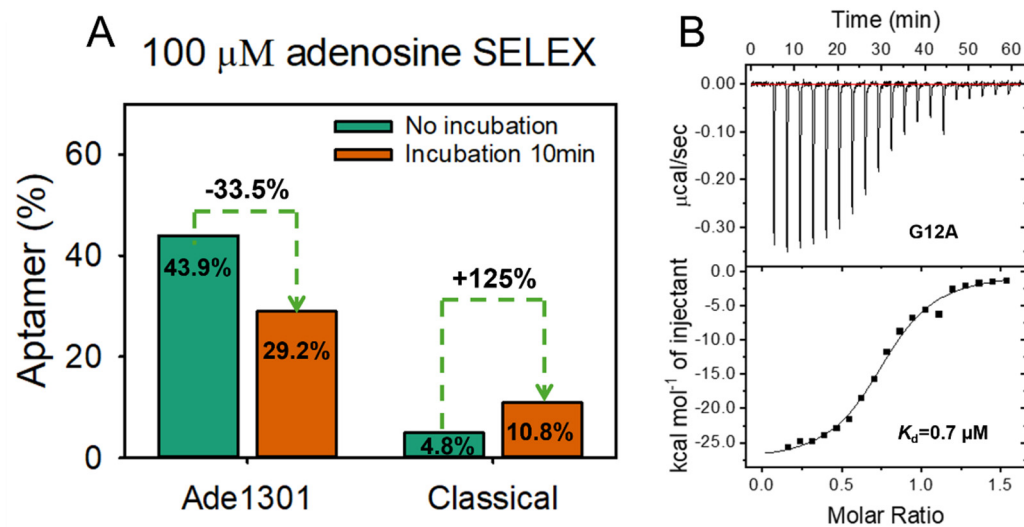

**Figure S6.** (A) Distribution of analyzed sequences obtained from 100  $\mu$ M adenosine SELEX performed under two conditions: without additional incubation and with 10 min incubation. Two sequences were analyzed: Ade1301 along with the G12A mutant and the classical adenosine aptamer. (B) ITC traces and integrated heat profiles for titrating 150  $\mu$ M adenosine to 20  $\mu$ M G12A mutant of the Ade1301 aptamer.



|                            |                                                               |      |
|----------------------------|---------------------------------------------------------------|------|
| <b>Family 1</b>            |                                                               |      |
| vo4                        | GTAGCTGATCTAGTCTGC <u>GAG</u> CCATGGCTATGGGTA                 | 2.6% |
| vo5                        | GTAGCGTAGTTTAGTTCGC <u>GAG</u> TGCATAGATGCAGTA                | 2.4% |
| vo9                        | GTAGACAGGTTTACTTGGC <u>GAG</u> GCTTCCCAAGCGTA                 | 1.5% |
| vo10                       | GTAGCAAACTGTGGTATGC <u>GAG</u> CCGTTACCCGGGTA                 | 1.4% |
| vo12                       | ACGTAGCTGTTTAACTTGC <u>GAG</u> CACTTGTTGGTAGA                 | 1.3% |
| vo13                       | GTAGCGATTTTTCGC <u>GAG</u> TGGACATAAGGGGCCAGTA                | 1.3% |
| vo14                       | GTAGCTCGGTATGAGC <u>GAG</u> TACAGTTGTCTGTAGTA                 | 1.3% |
| vo15                       | GCGTAGCCTTAGC <u>GAG</u> CCACGGTTTACGGGGGTAGA                 | 1.2% |
| vo16                       | GTAGCACACTGCTGC <u>GAG</u> CTGTCTTTTCAACAGGTA                 | 1.2% |
| vo17                       | GTAGCAGGTTACGGCTGC <u>GAG</u> CTCCTTGCGGAGGTA                 | 1.1% |
| vo18                       | GTAGCAATGTTCTGC <u>GAG</u> TTTACGTTTCGTAAAGTA                 | 1.1% |
| vo19                       | GTAGCACAATTTGC <u>GAG</u> CCCGGATTTCAGGGGTA                   | 1.1% |
| vo20                       | GTAGGAATGGGTTC <u>GAG</u> TCCAAGTACACTGGAGTA                  | 1.1% |
| vo8                        | GTAGCAGGTTATCTGC <u>GAG</u> CGAGTTGAATCGAGATA                 | 1.6% |
| vo6                        | <u>GAG</u> TCGGACATGGTATGCTCCGA <u>GTA</u> GGGCACC <u>GTA</u> | 2.1% |
| vo7                        | <u>GAG</u> TAGGATTGTTTATCGTCC <u>GTA</u> GTTTTGCGAGGA         | 1.8% |
| vo11                       | GTAGGCATACACTTCGTATGGC <u>GTA</u> GCGTCAGC <u>GAG</u>         | 1.4% |
| vo2                        | GGTAGTGAATGGTTTATCTGAAC <u>GTA</u> GCTAGC <u>GAG</u> C        | 3.6% |
| <b>Ungrouped sequences</b> |                                                               |      |
| vo1                        | TGGGCGTAGTTGTGCGACGAATAAGTTTCGTAGGCCT                         | 4.3% |
| vo3                        | TTAAAGGGTTTGTTCCTTGTACCAGGAATGGATTTA                          | 2.8% |

**Figure S7.** Alignment of the top 20 sequences from the voriconazole SELEX. 18 of them can be classified into one family feature with three groups of conserved trinucleotides separated by stem loops. The underlined nucleotides can base pair.

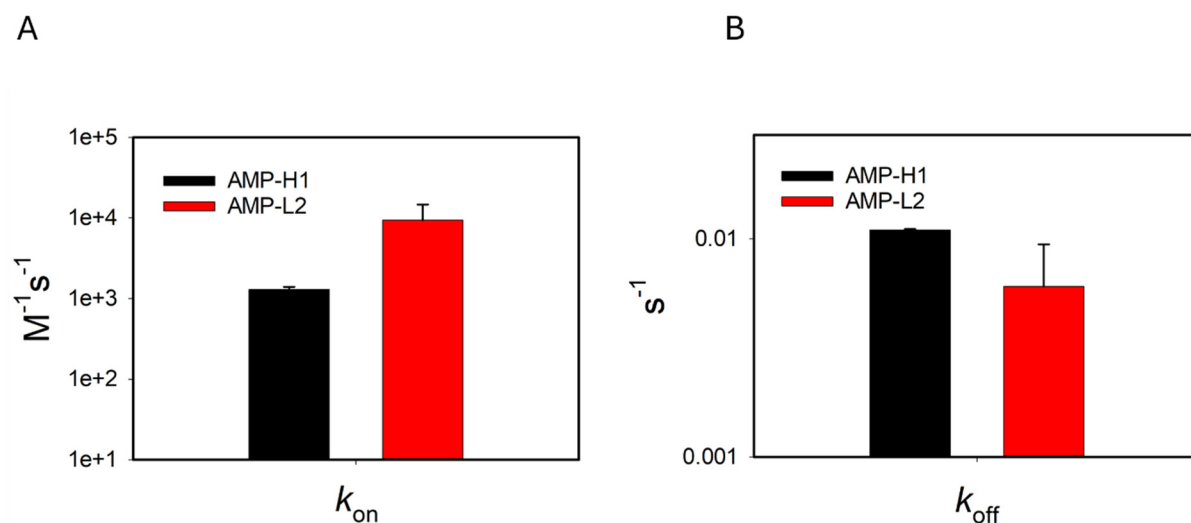

**Figure S8.** The (A)  $k_{on}$  and (B)  $k_{off}$  values of the two ampicillin aptamers from Affinimeter software using the Kinetic ITC method.

## References

- 1 Yang, K.-A., Pei, R. & Stojanovic, M. N. In vitro selection and amplification protocols for isolation of aptameric sensors for small molecules. *Methods* **106**, 58-65 (2016).
- 2 Zhang, H., Li, A. Z. & Liu, J. Surfactant-Assisted Label-Free Fluorescent Aptamer Biosensors and Binding Assays. *Biosensors* **13**, 434 (2023).
- 3 Gu, L., Zheng, J., Zhang, Y., Wang, D. & Liu, J. Selection and Characterization of DNA Aptamers for Cytidine and Uridine. *ChemBioChem* **25**, e202300656 (2024).
- 4 Ding, Y. & Liu, J. Pushing Adenosine and ATP SELEX for DNA Aptamers with Nanomolar Affinity. *J. Am. Chem. Soc.* **145**, 7540–7547 (2023).
- 5 Huang, P.-J. J. & Liu, J. Selection of aptamers for sensing caffeine and discrimination of its three single demethylated analogues. *Analytical Chemistry* **94**, 3142-3149 (2022).
- 6 Niu, C., Zhang, C. & Liu, J. Capture-SELEX of DNA Aptamers for Estradiol Specifically and Estrogenic Compounds Collectively. *Environ. Sci. Technol.* **56**, 17702–17711 (2022).
- 7 Huang, P. J. J. & Liu, J. Simultaneous Detection of L-Lactate and D-Glucose Using DNA Aptamers in Human Blood Serum. *Angewandte Chemie International Edition* **62**, e202212879 (2023).
- 8 Liu, Y. & Liu, J. Selection of DNA aptamers for sensing uric acid in simulated tears. *Analysis & Sensing* **2**, e202200010 (2022).
- 9 Gu, L., Zhang, Y., Wang, D. & Liu, J. Light-Up Sensing Citrate Using a Capture-Selected DNA Aptamer. *Advanced Sensor Research* **3**, 2300167 (2024).
- 10 Huang, P.-J. J. & Liu, J. A DNA Aptamer for Theophylline with Ultrahigh Selectivity Reminiscent of the Classic RNA Aptamer. *ACS Chemical Biology* **17**, 2121–2129 (2022).
